# Supplementary material for: Methylated metabolite of arsenite blocks glycerol production in yeast by inhibition of glycerol-3-phosphate dehydrogenase
Source: PubMed Central journal article supplement — Mol Biol Cell. 2019 Aug 1;30(17):2134–40. doi: 10.1091/mbc.E19-04-0228 (PMC6743455; doi:10.1091/mbc.e19-04-0228), 2019-08-01
Supplement: mbc-30-2134-s001.pdf [file mbc-30-2134-s001.pdf]

# Supplemental Materials

*Molecular Biology of the Cell*

Lee and Levin

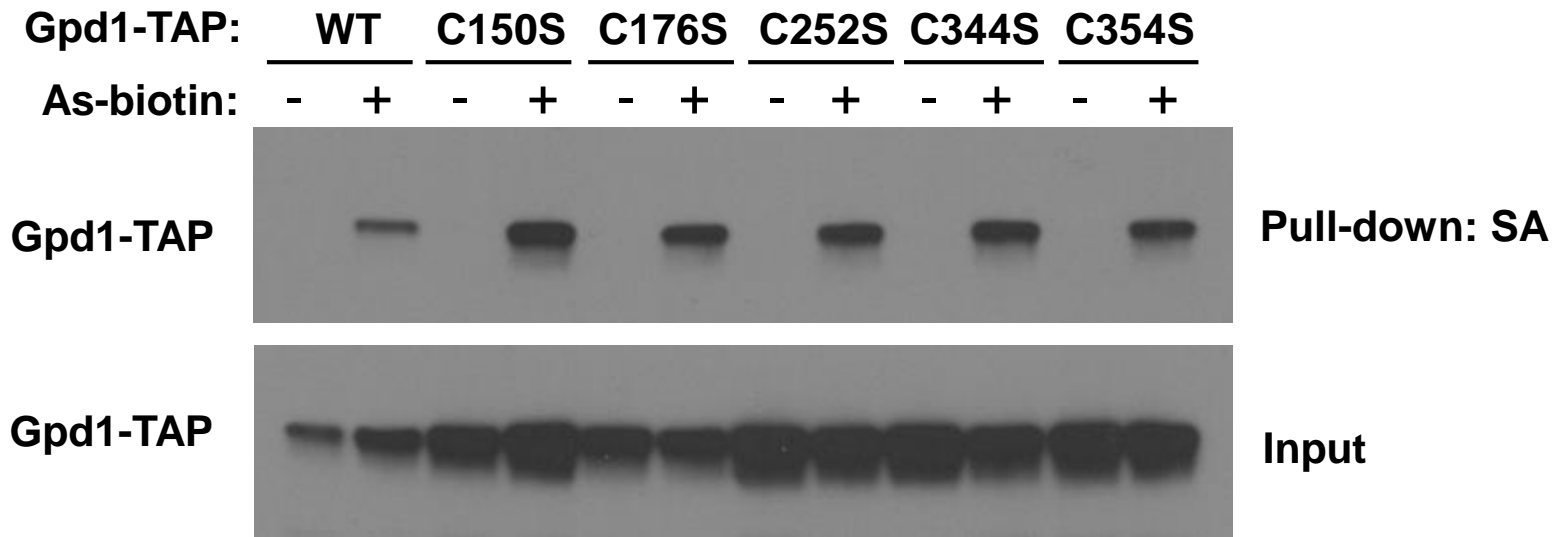

Supplemental Figure S1. As-biotin pull-down of Gpd1 Cys-Ser mutants. (A) A *gpd1Δ gpd2Δ* mutant (DL4285) transformed with plasmids expressing Gpd1-TAP forms under the inducible control of the *GAL1* promoter (WT, p3467; C150S, p3499; C176S, p3500; C252S, p3501; C344S, p3502; C354S, p3503) were treated for 10 min with 10  $\mu$ M As-biotin. Extracts were subjected to affinity pull-down with streptavidin agarose (SA) beads prior to SDS-PAGE and immunoblot analysis for Gpd1-TAP.

Table S1. Plasmids used in this study.

| Plasmid | Description                                               | Source or Reference          |
|---------|-----------------------------------------------------------|------------------------------|
| p115    | pRS316                                                    | Sikorski and Hieter, 1989    |
| p2823   | pAG32                                                     | Goldstein and McCusker, 1999 |
| p3467   | <i>GAL1<sup>P</sup>–GPD1-TAP</i> (6HIS-HA-ZZ)             | Open Biosystems              |
| p3494   | <i>GAL1<sup>P</sup>–GPD1-C134S-TAP</i> (6HIS-HA-ZZ)       | This study                   |
| p3495   | <i>GAL1<sup>P</sup>–GPD1-C241S-TAP</i> (6HIS-HA-ZZ)       | This study                   |
| p3496   | <i>GAL1<sup>P</sup>–GPD1-C306S-TAP</i> (6HIS-HA-ZZ)       | This study                   |
| p3497   | <i>GAL1<sup>P</sup>–GPD1-C306A-TAP</i> (6HIS-HA-ZZ)       | This study                   |
| p3498   | <i>GAL1<sup>P</sup>–GPD1-C134S C306S-TAP</i> (6HIS-HA-ZZ) | This study                   |
| p3499   | <i>GAL1<sup>P</sup>–GPD1-C150S-TAP</i> (6HIS-HA-ZZ)       | This study                   |
| p3500   | <i>GAL1<sup>P</sup>–GPD1-C176S-TAP</i> (6HIS-HA-ZZ)       | This study                   |
| p3501   | <i>GAL1<sup>P</sup>–GPD1-C252S-TAP</i> (6HIS-HA-ZZ)       | This study                   |
| p3502   | <i>GAL1<sup>P</sup>–GPD1-C344S-TAP</i> (6HIS-HA-ZZ)       | This study                   |
| p3503   | <i>GAL1<sup>P</sup>–GPD1-C354S-TAP</i> (6HIS-HA-ZZ)       | This study                   |

Goldstein AL, McCusker JH (1999). Three new dominant drug resistance cassettes for gene disruption in *Saccharomyces cerevisiae*. *Yeast* 15, 1541-1553.

Sikorski RS, Hieter P (1989). A system of shuttle vectors and yeast host strains designed for efficient manipulation of DNA in *Saccharomyces cerevisiae*. *Genetics* 122, 19-27.
